# Supplementary material for: RTEL1 influences the abundance and localization of TERRA RNA
Source: PubMed Central journal article supplement (PMC8140157; doi:10.1038/s41467-021-23299-2), 2021-05-21
Supplement: 41467_2021_23299_MOESM1_ESM.pdf [file 41467_2021_23299_MOESM1_ESM.pdf]

# Supplementary Figure 1

a.

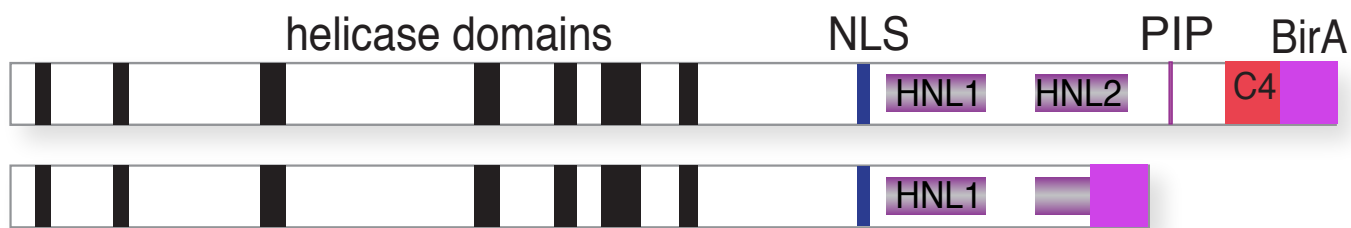

b.

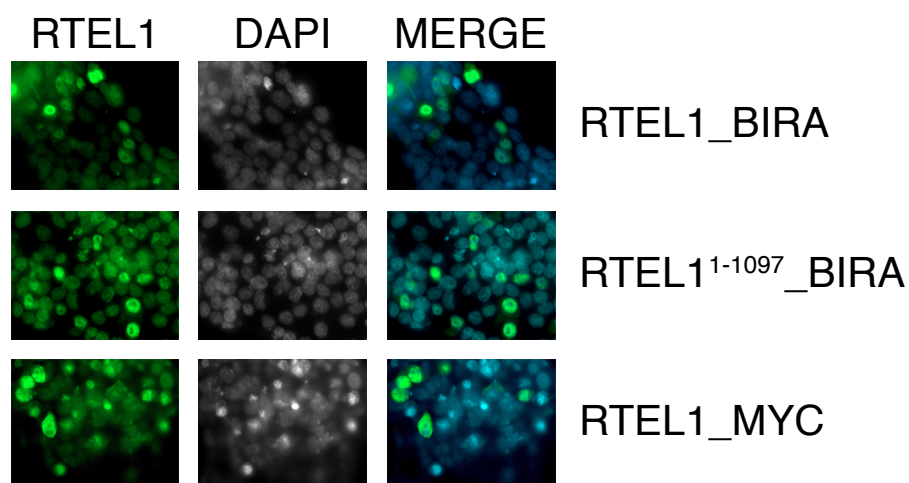

c.

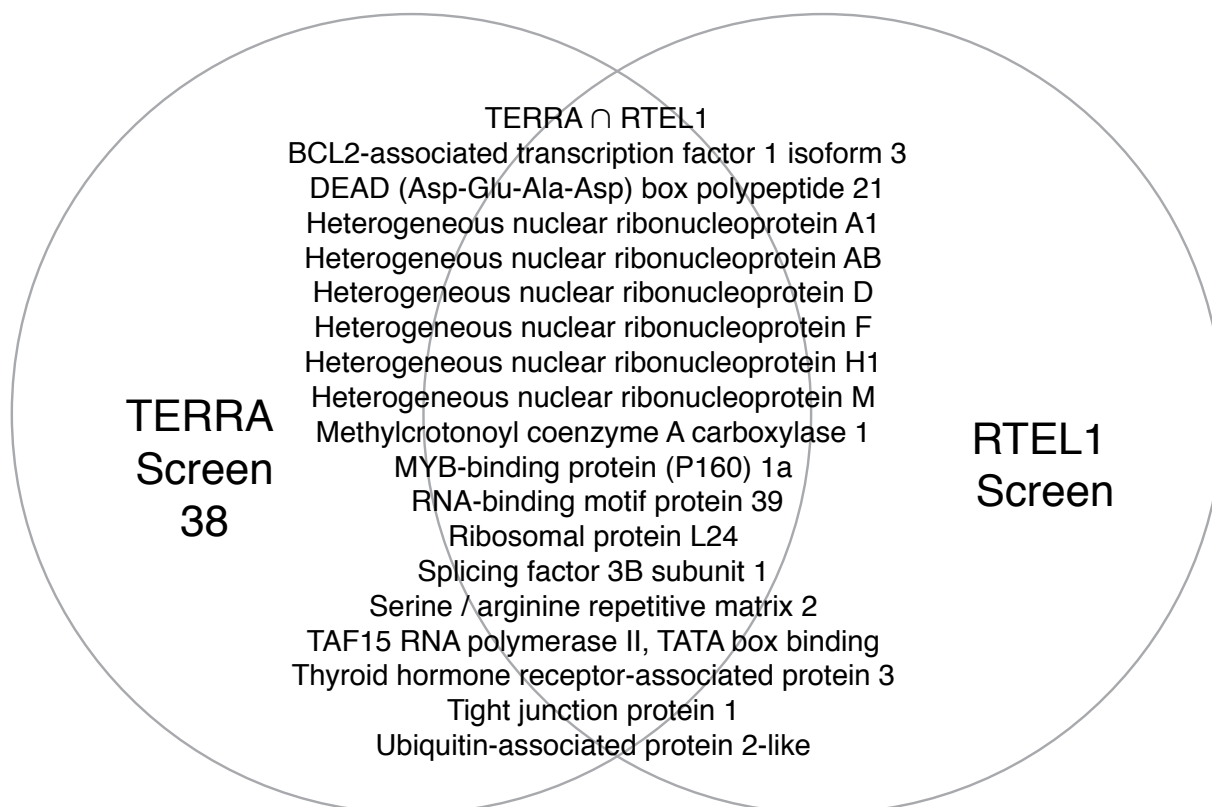

## Supplementary Figure 1

(A) Schematic representation of *RTEL1-BirA* constructs used in this study. (B) *RTEL1-BirA* fusions did not affect the primarily nuclear localization of *RTEL1-BirA* compared to myc-tagged *RTEL1*. (C) Close to 50% of proteins obtained in a Biotin-TERRA pull-down (Lopez de Silanes, Stagno d'Alcontres et al. 2010) matched proteins that were enriched for in the *RTEL1-BirA* construct.

# Supplementary Figure 2

a.

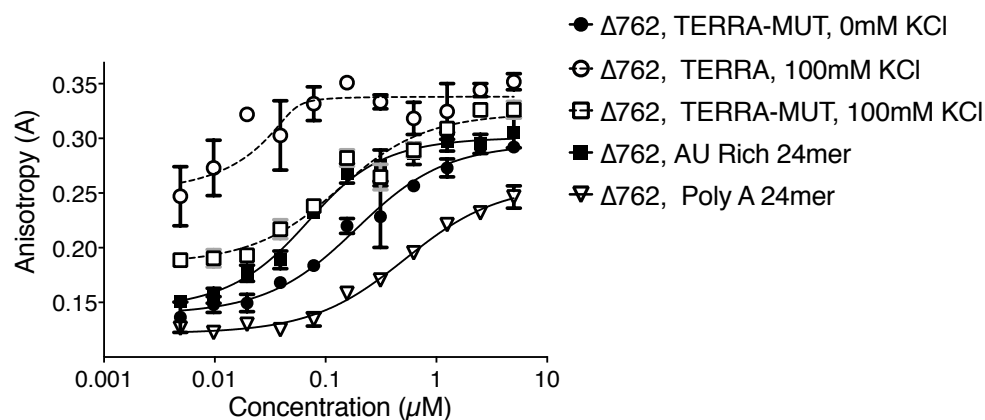

| Oligo                 | KD (nM)      |
|-----------------------|--------------|
| AU Rich 24mer         | 42.0 ± 6.1   |
| Poly A, 24mer         | 497.6 ± 47.8 |
| TERRA, 0 mM KCl       | 37.1 ± 9.6   |
| TERRA-MUT, 100 mM KCl | 107.7 ± 21.6 |
| TERRA, 100 mM KCl     | 1.3 ± 3.6    |

b.

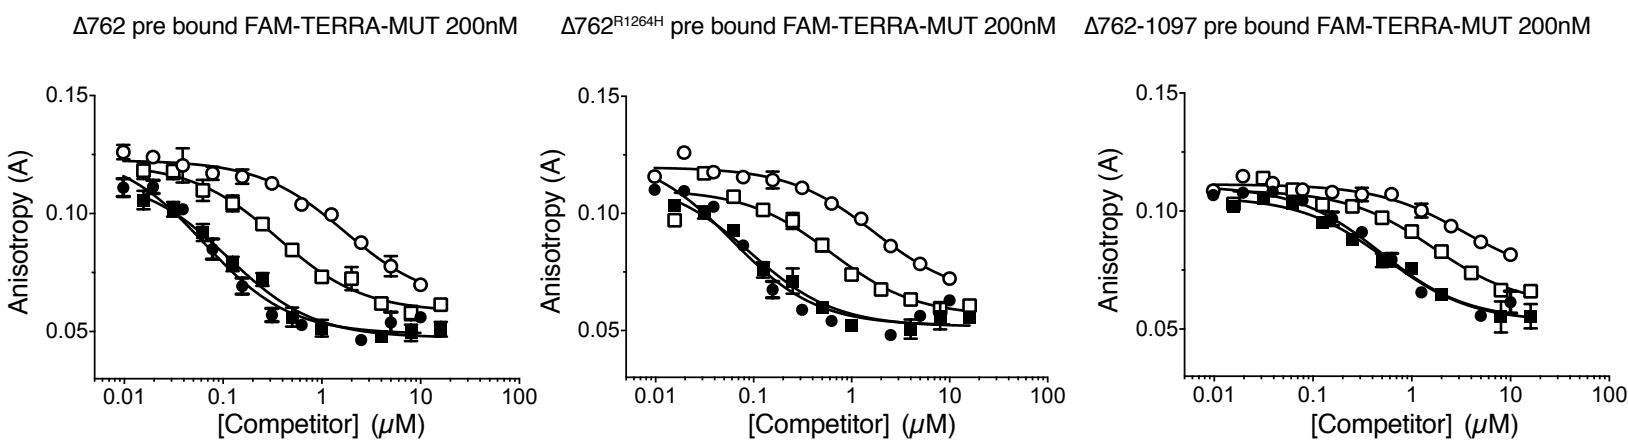

- TERRA-competitor
- TERRA-MUT-competitor
- hTelo-competitor
- hTelo-MUT-competitor

|                       | TERRA<br>Ki (uM) | TERRA-MUT<br>Ki (uM) | hTelo<br>Ki (uM) | hTelo-MUT<br>Ki (uM) |
|-----------------------|------------------|----------------------|------------------|----------------------|
| $\Delta 762$          | 0.017 ± 0.003    | 0.442 ± 0.074        | 0.029 ± 0.004    | 0.093 ± 0.011        |
| $\Delta 762^{R1264H}$ | 0.030 ± 0.007    | 0.850 ± 0.125        | 0.047 ± 0.009    | 0.309 ± 0.068        |
| $\Delta 762-1097$     | 0.245 ± 0.035    | 1.652 ± 0.377        | 0.276 ± 0.039    | 0.826 ± 0.134        |

## **Supplementary Figure 2**

Experimental fluorescence anisotropy data used to calculate apparent dissociation constants for RTEL1 proteins binding to RNA and DNA oligonucleotides indicated in Fig. 2. (A) Binding curves for TERRA and TERRA-MUT RNAs folded in the presence and absence of KCl, and AU-rich and polyA RNA controls. (B) Increasing concentrations of the indicated oligonucleotides were added to reactions containing RTEL1 proteins and a 24mer FAM-TERRA-MUT RNA at 200 nM. Curves for the bound FAM-TERRA-MUT competed by the indicated oligonucleotides are shown. All binding assays were conducted in triplicate and mean and standard deviation are shown.

# Supplementary Figure 3

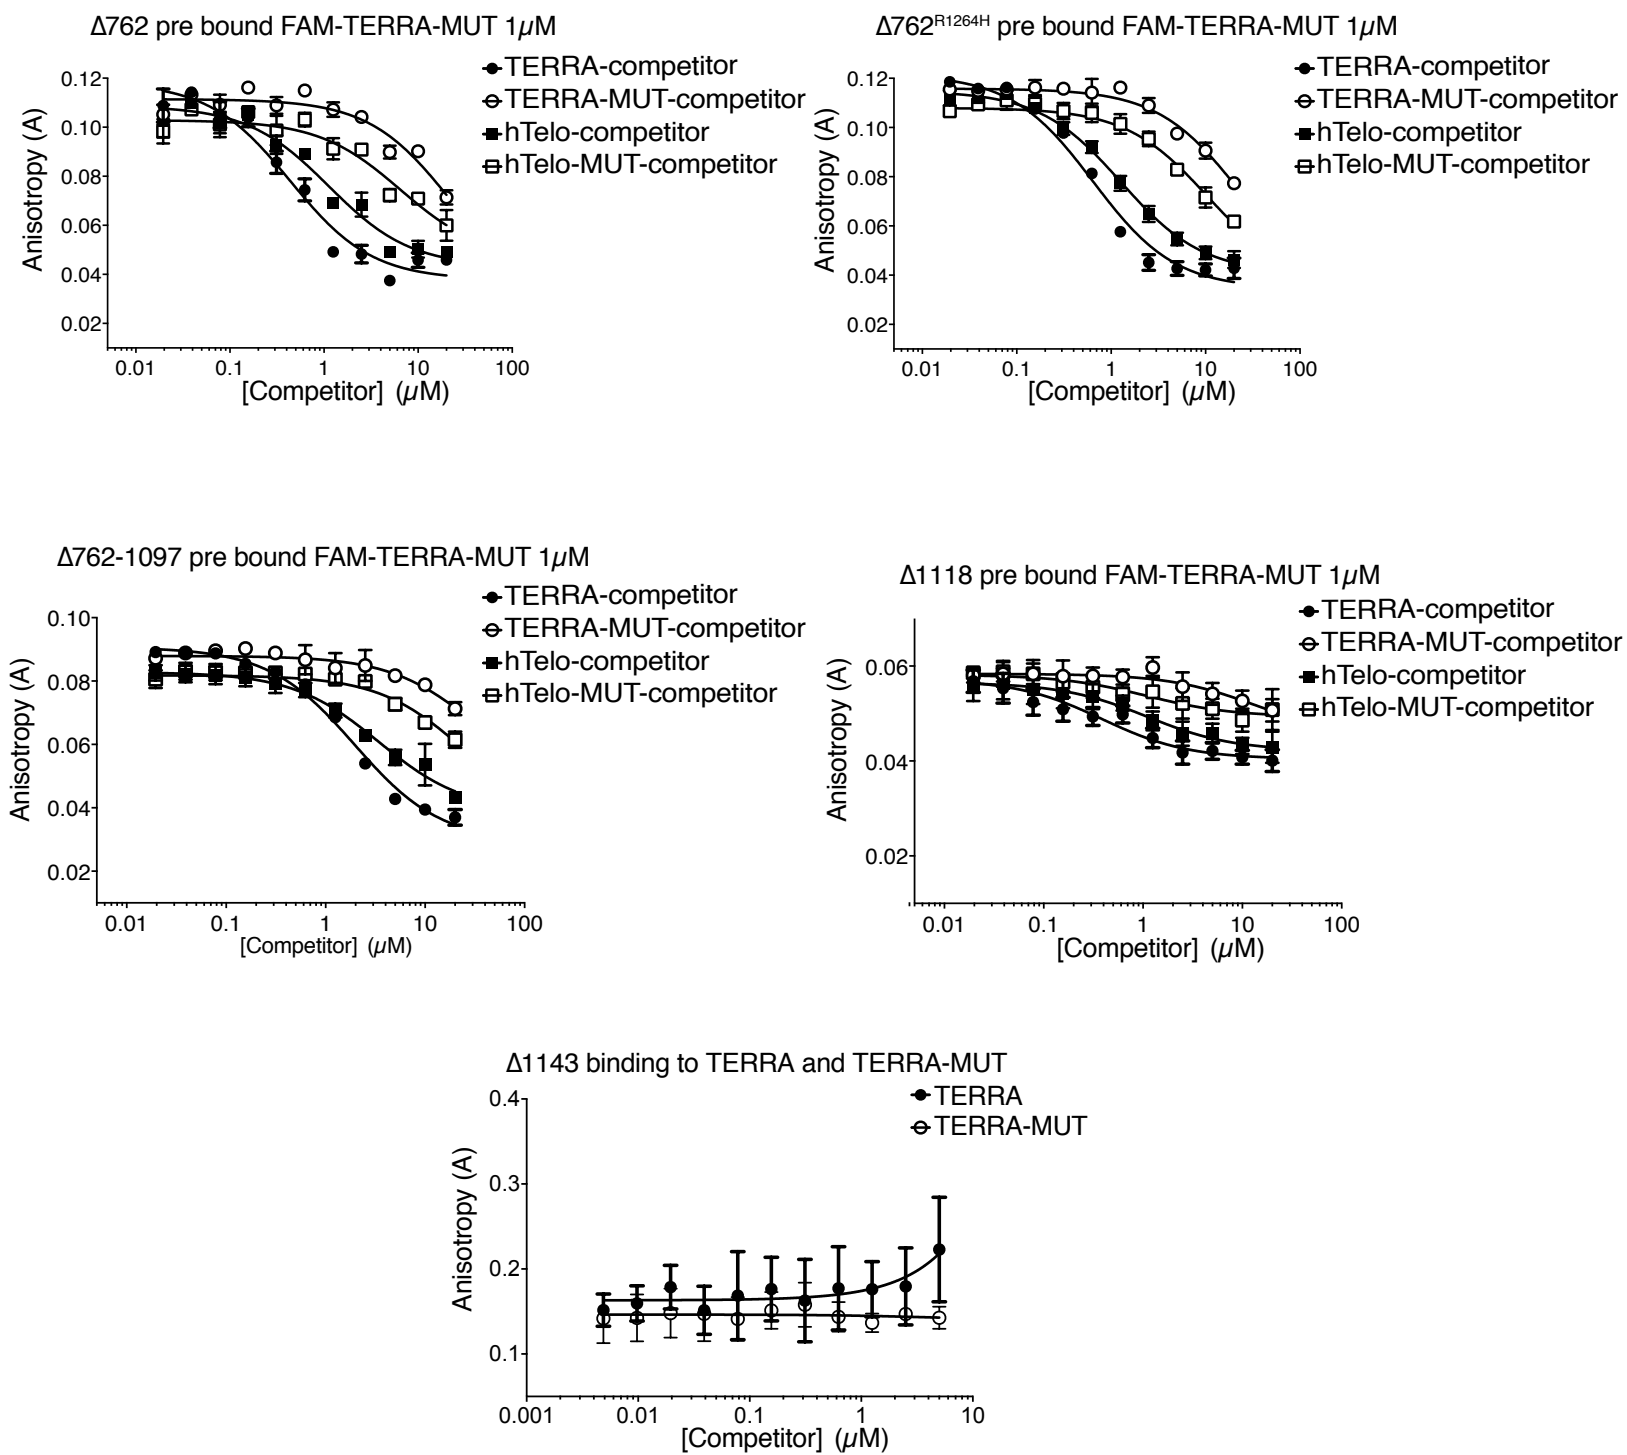

|                        | TERRA<br>Ki (uM) | TERRA-MUT<br>Ki (uM) | hTelo<br>Ki (uM) | hTelo-MUT<br>Ki (uM) |
|------------------------|------------------|----------------------|------------------|----------------------|
| Δ762                   | 0.029 ± 0.004    | 1.45 ± 0.073         | 0.074 ± 0.012    | 0.42 ± 0.14          |
| Δ762 <sup>R1264H</sup> | 0.107 ± 0.014    | 3.81 ± 1.45          | 0.212 ± 0.017    | 1.75 ± 0.52          |
| Δ762-1097              | 0.978 ± 0.084    | 16.14 ± 15.05        | 1.716 ± 0.302    | 12.58 ± 8.47         |
| Δ1118                  | 0.065 ± 0.018    | 2.19 ± 2.08          | 0.184 ± 0.064    | 0.18 ± 0.10          |
| Δ1143                  | NA               | NA                   | NA               | NA                   |

### Supplementary Figure 3

Experimental fluorescence anisotropy data used to calculate apparent dissociation constants for RTEL1 deletion constructs binding to RNA and DNA oligonucleotides indicated in Fig. 2. Increasing concentrations of the indicated oligonucleotides were added to reactions containing the indicated RTEL1 proteins and a 24mer FAM-TERRA-MUT RNA at 1  $\mu$ M. Binding curves used to calculate apparent dissociation constants ( $K_i$ ) are shown. For RTEL <sup>$\Delta$ 1143</sup> direct binding to TERRA and TERRA-MUT RNAs is shown. All binding assays were conducted in triplicate and mean and standard deviation are shown.

# Supplementary Figure 4

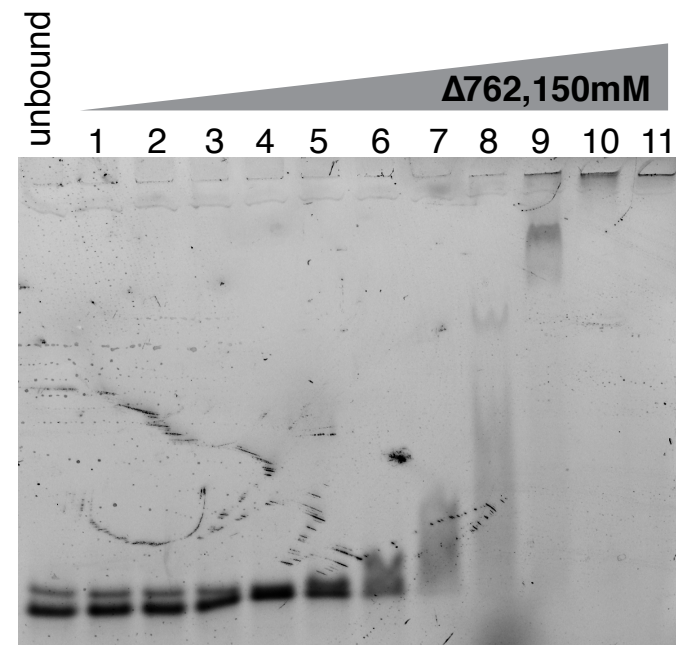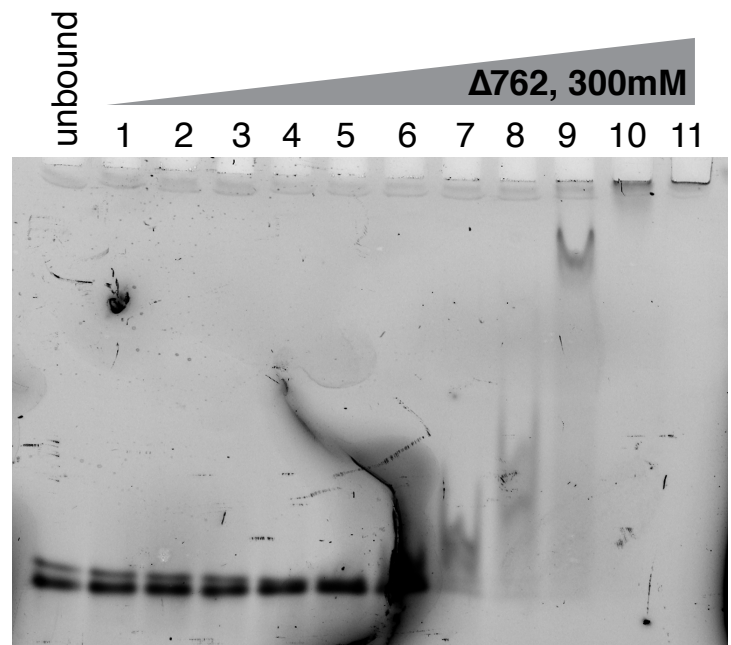

| [Protein], nM |       |
|---------------|-------|
| 1             | 0.005 |
| 2             | 0.019 |
| 3             | 0.076 |
| 4             | 0.305 |
| 5             | 1.221 |
| 6             | 4.883 |
| 7             | 19.53 |
| 8             | 78.13 |
| 9             | 312.5 |
| 10            | 1250  |
| 11            | 5000  |

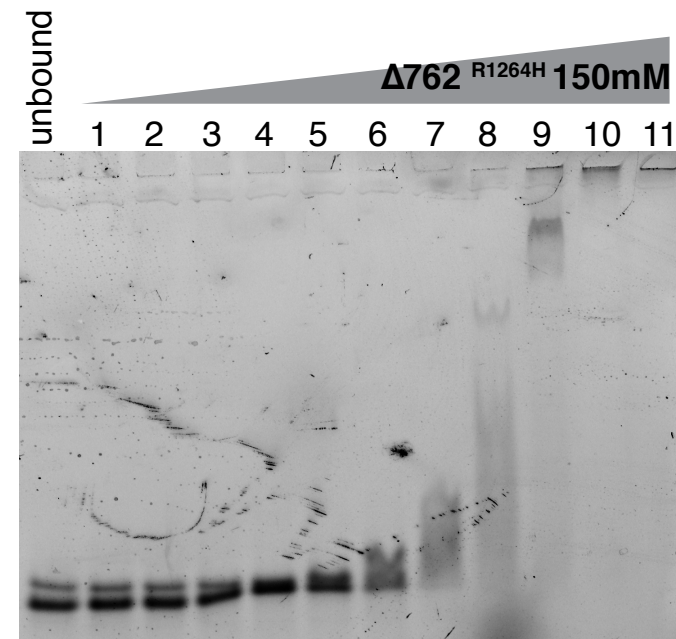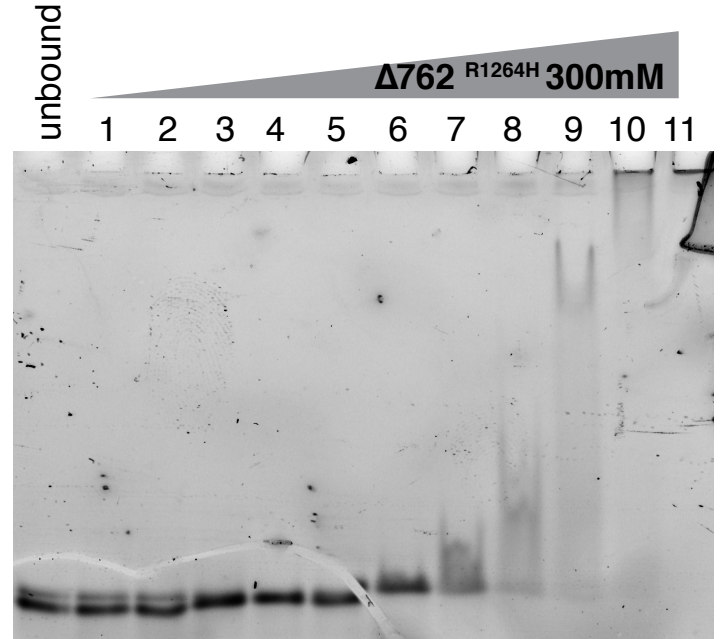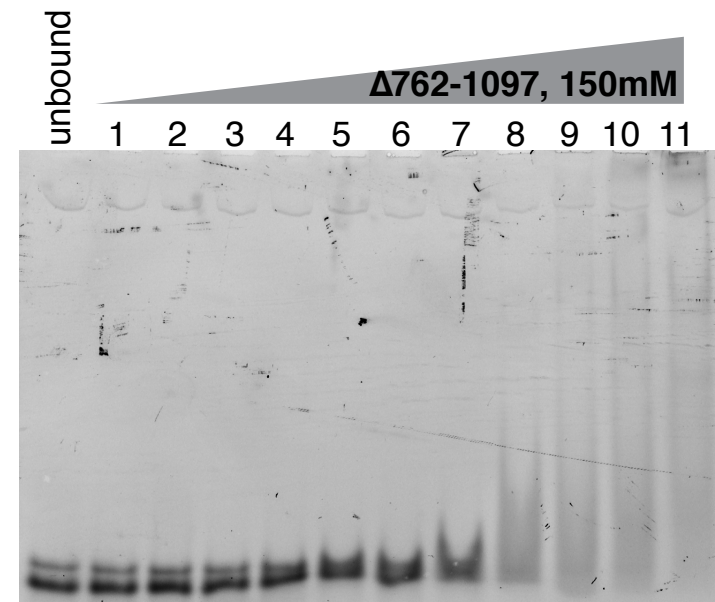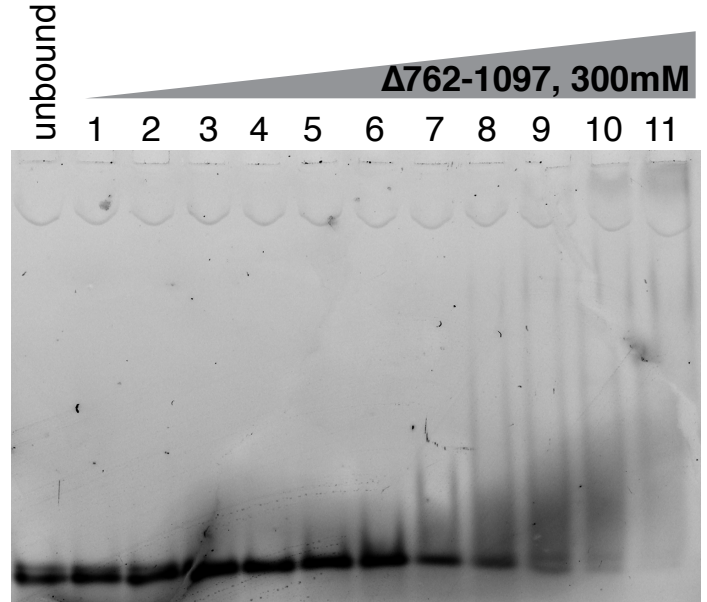

#### **Supplementary Figure 4**

Representative native electrophoretic mobility shift assays (EMSA) with TERRA oligonucleotides at 2.5 nM and increasing amounts of the indicated recombinant proteins. Unbound indicates the free probe without protein added. EMSAs at 150 mM or 300 mM KCl are shown.



# Supplementary Figure 5

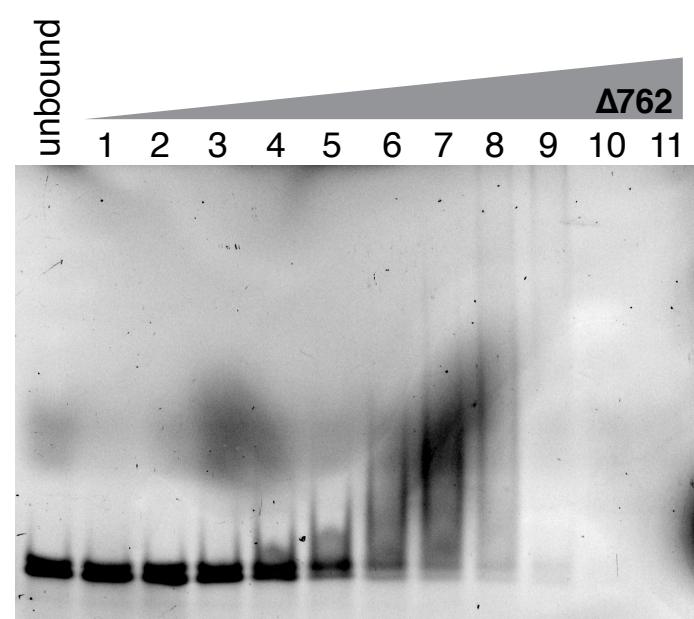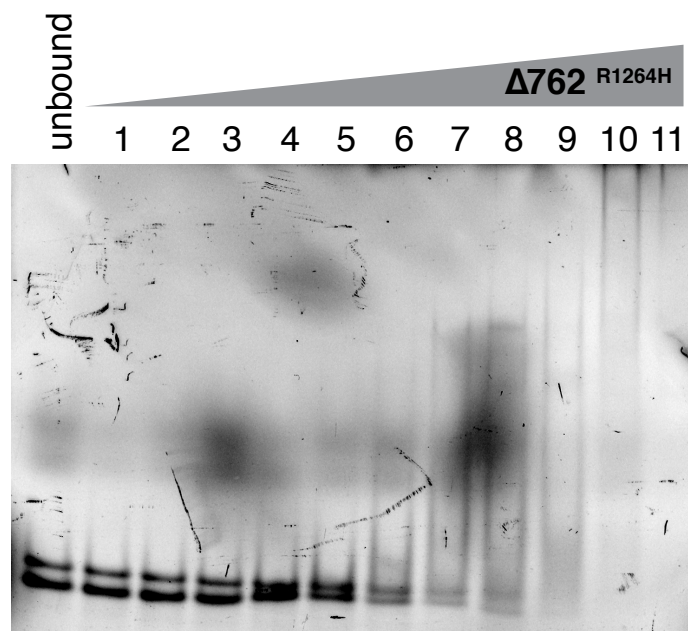

|    | [Protein], nM |
|----|---------------|
| 1  | 0.005         |
| 2  | 0.019         |
| 3  | 0.076         |
| 4  | 0.305         |
| 5  | 1.221         |
| 6  | 4.883         |
| 7  | 19.53         |
| 8  | 78.13         |
| 9  | 312.5         |
| 10 | 1250          |
| 11 | 5000          |

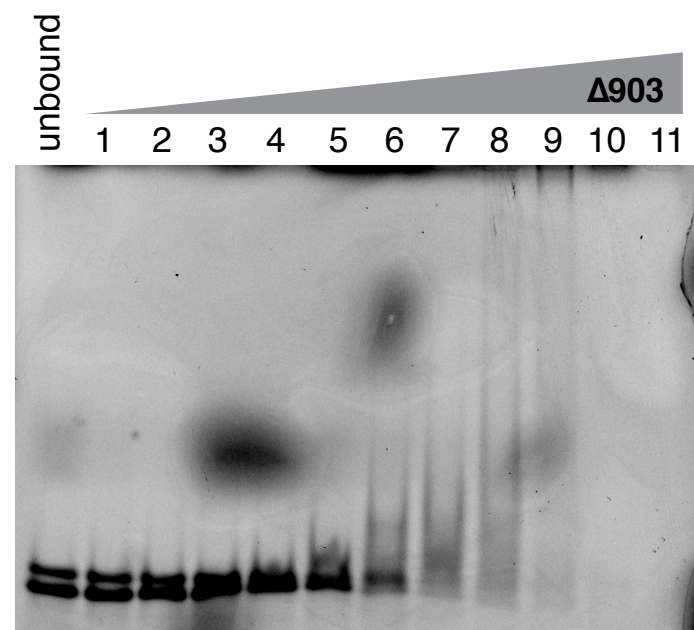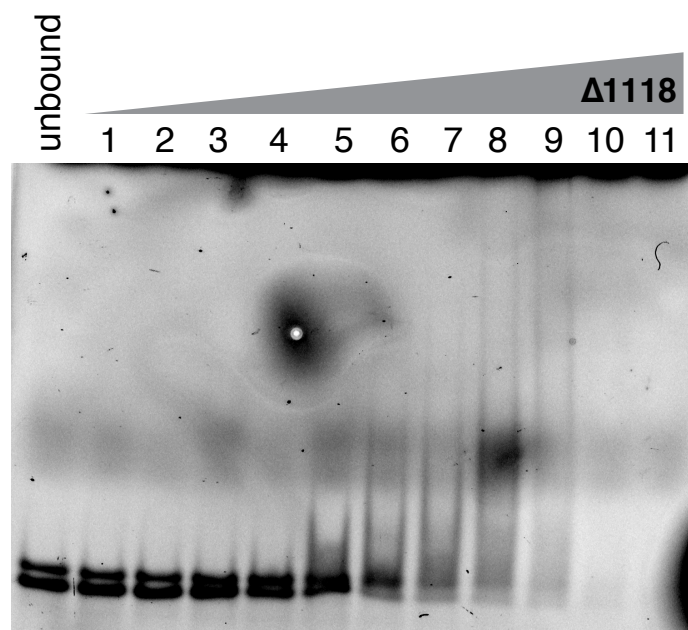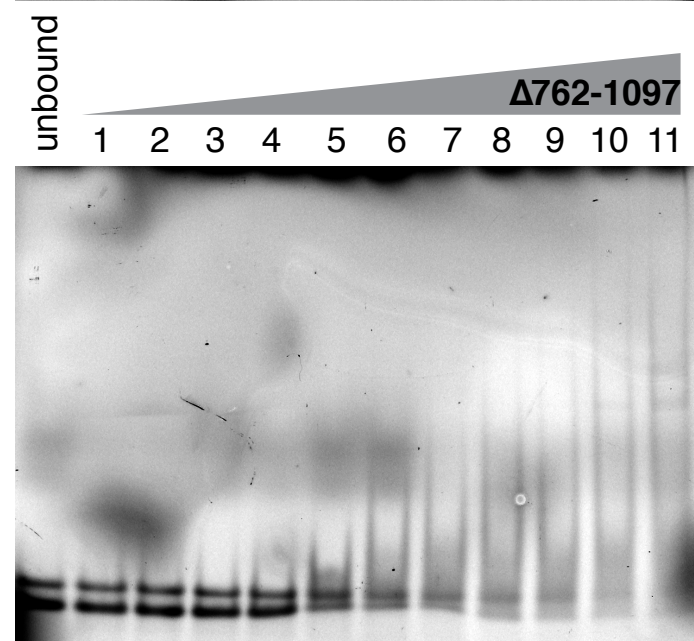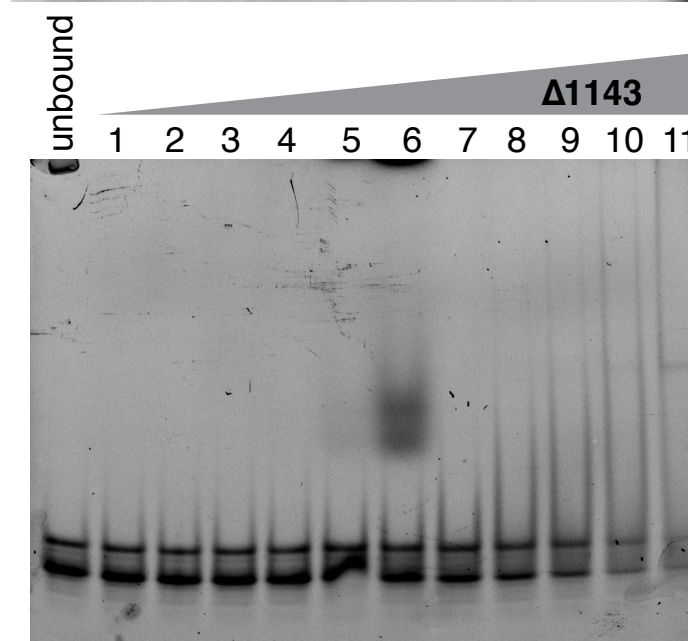

### **Supplementary Figure 5**

Representative native electrophoretic mobility shift assays (EMSA) with TERRA oligonucleotides at 2.5 nM and 150 mM KCl. Increasing amounts of the indicated recombinant RTEL1 truncated proteins were added. Unbound indicates the free probe without protein added. Negligible binding was observed for RTEL1<sup>Δ1143</sup> at 5 μM protein concentration.

# Supplementary Figure 6

a.

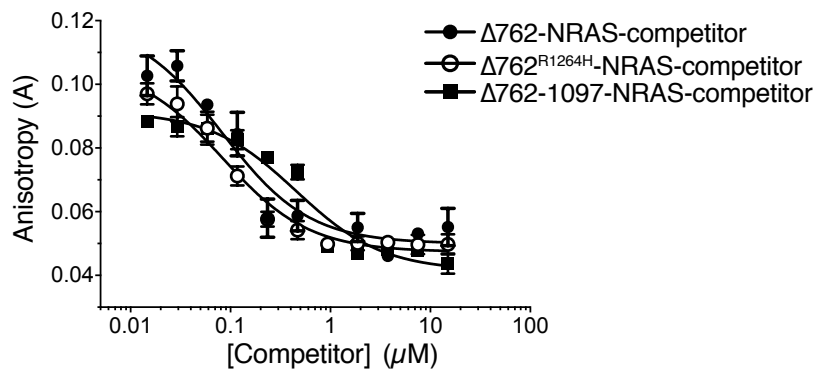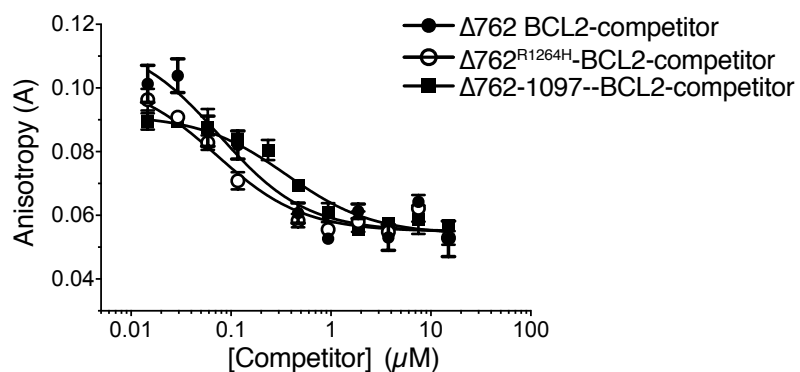

b.

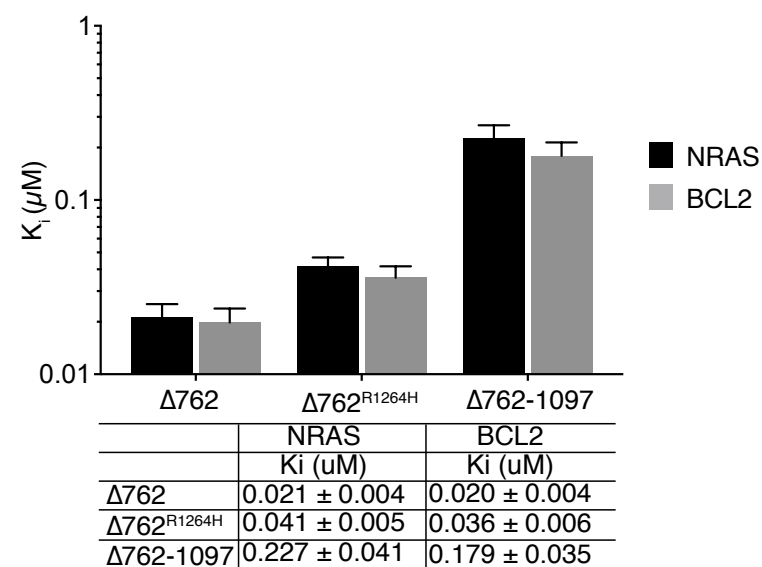

c.

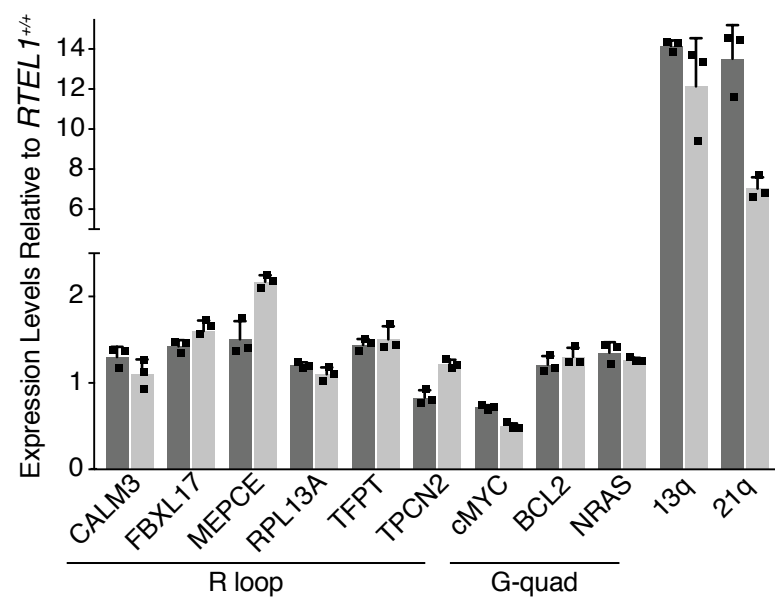

d.

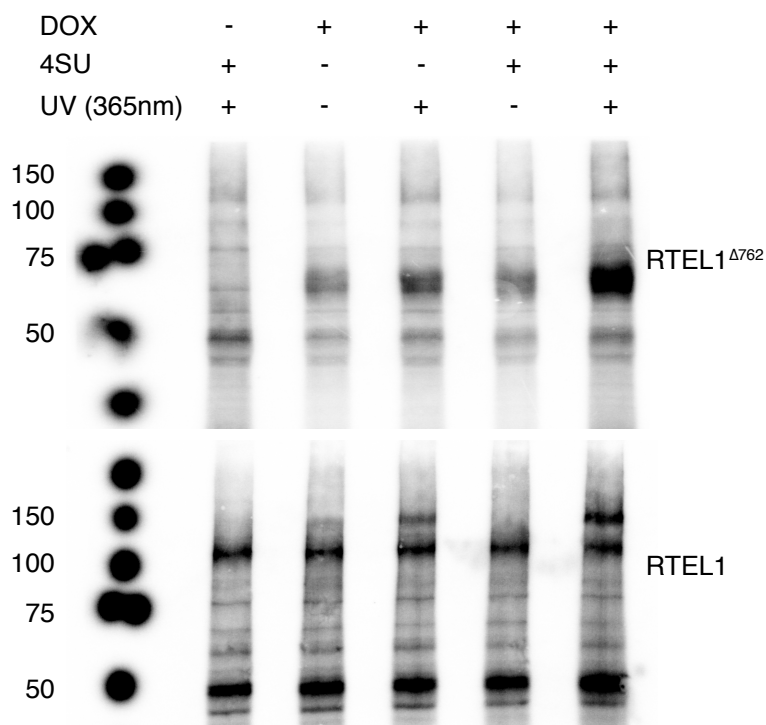

e.

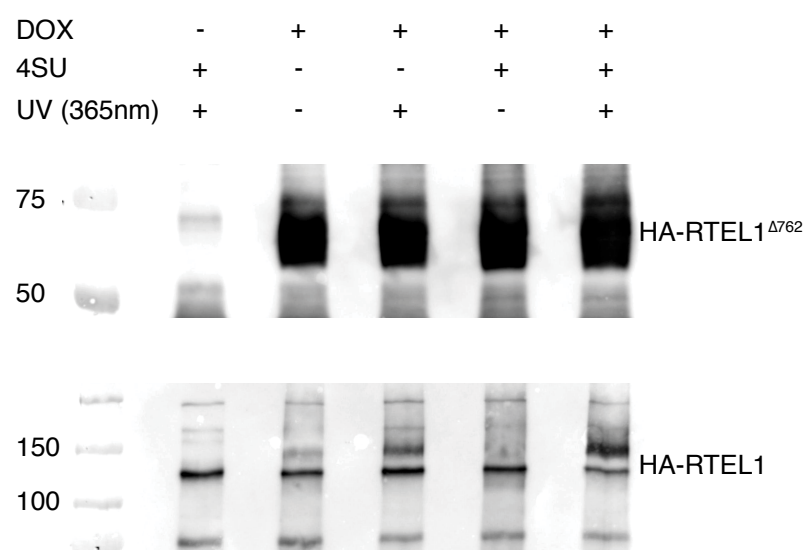

## Supplementary Figure 6

RTEL1 binding to NRAS and BCL2 oligonucleotides was monitored by fluorescence anisotropy. (A) Increasing concentrations of the indicated oligonucleotides were added to reactions containing the indicated RTEL1 proteins and a 24mer FAM-TERRA-MUT RNA. Binding curves used to calculate apparent dissociation constants ( $K_i$ ) are shown. (B) Bar graphs show apparent dissociation constants ( $K_i$ ) derived by competition experiments in A. All binding assays were conducted in triplicate and mean and standard deviation are shown. (C) Expression levels of non-telomere targets predicted to form R-loops and G-quadruplexes measured by qRT-PCR. No significant differences were observed in RTEL1-KO cells compared to wild type HEK293 cells. Mean and standard deviation are shown for two independent experiments with three technical replicates each. (D) FLAG-tagged RTEL1 and RTEL1<sup>Δ762</sup> proteins were separated by SDS-PAGE after 4SU PAR-CLIP. Autoradiograph of cross-linked, <sup>32</sup>P-labelled RNA-FLAG-tagged-RTEL1 immunoprecipitates is shown. (E) Western blot analysis of cross-linked RNA-protein immunoprecipitates shown in D. 4SU PAR-CLIP and Western blots were repeated at least two times yielding similar results. Molecular weight markers, KDa are shown.

# Supplementary Figure 7

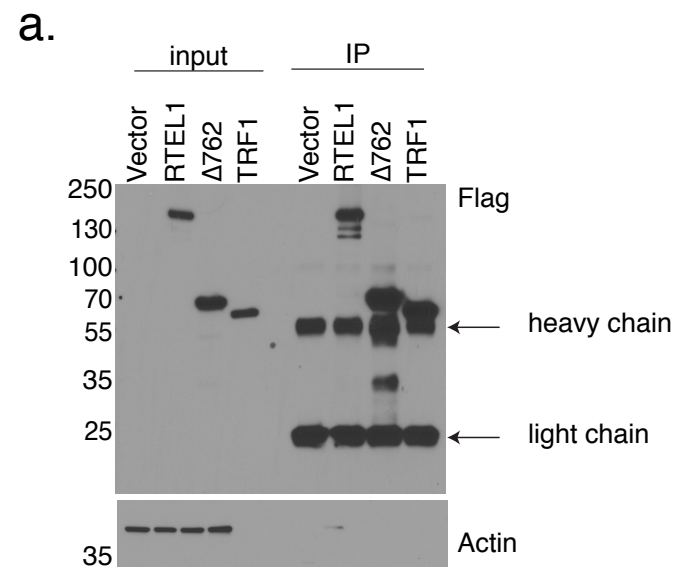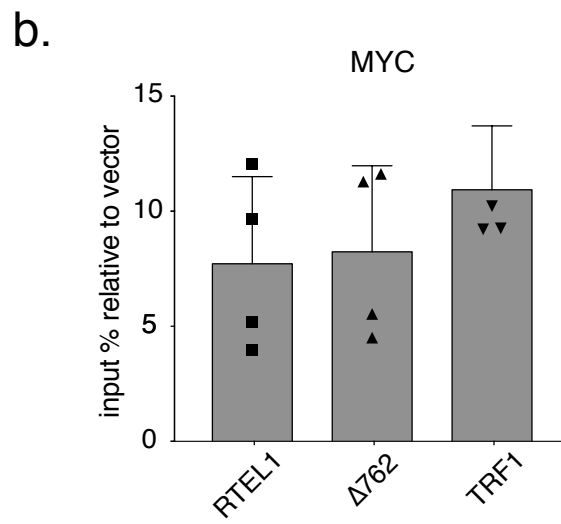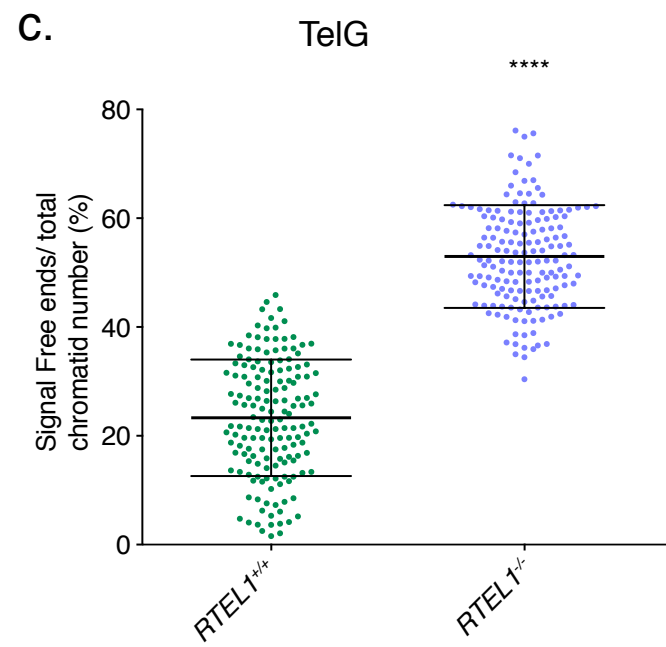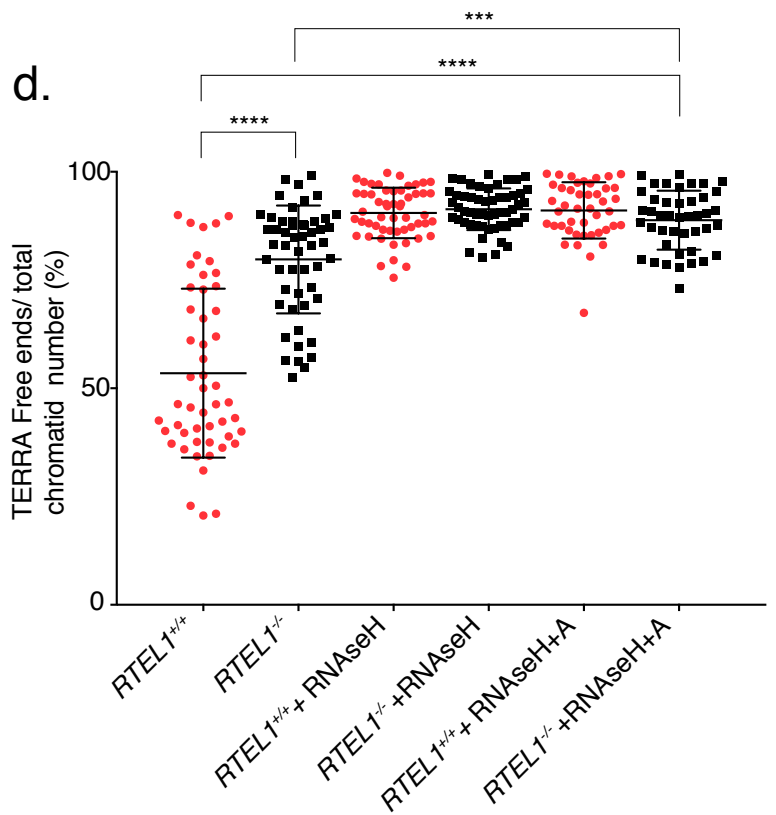

## Supplementary Figure 7

(A) Western blot of input and immunoprecipitates of FLAG tagged proteins from RNA-IP samples in Fig. 2E is shown. Molecular weight markers, KDa are shown.

(B) Quantitation of 4 independent RNA-IP experiments using a *MYC* probe. The mean and standard deviation of relative RNA-IP normalized to the vector only control is shown.

(C) Quantification of telomere loss per chromatid using a TelG PNA probe. Data represents the average of at least 50 metaphases in each of three independent experiments as mean and standard deviation (\*\* $p < 0.001$ , two-sided t-test).

(D) Quantification of TERRA loss per chromatid following RNase treatment *in vitro* or treatment with reaction buffer only. Data represents the average of at least 20 metaphases in each of 2 independent experiments as mean and standard deviation (\*\* $p < 0.001$ , \*\*\*\* $p < 0.0001$ , two-sided t-test)

# Supplementary Figure 8

a.

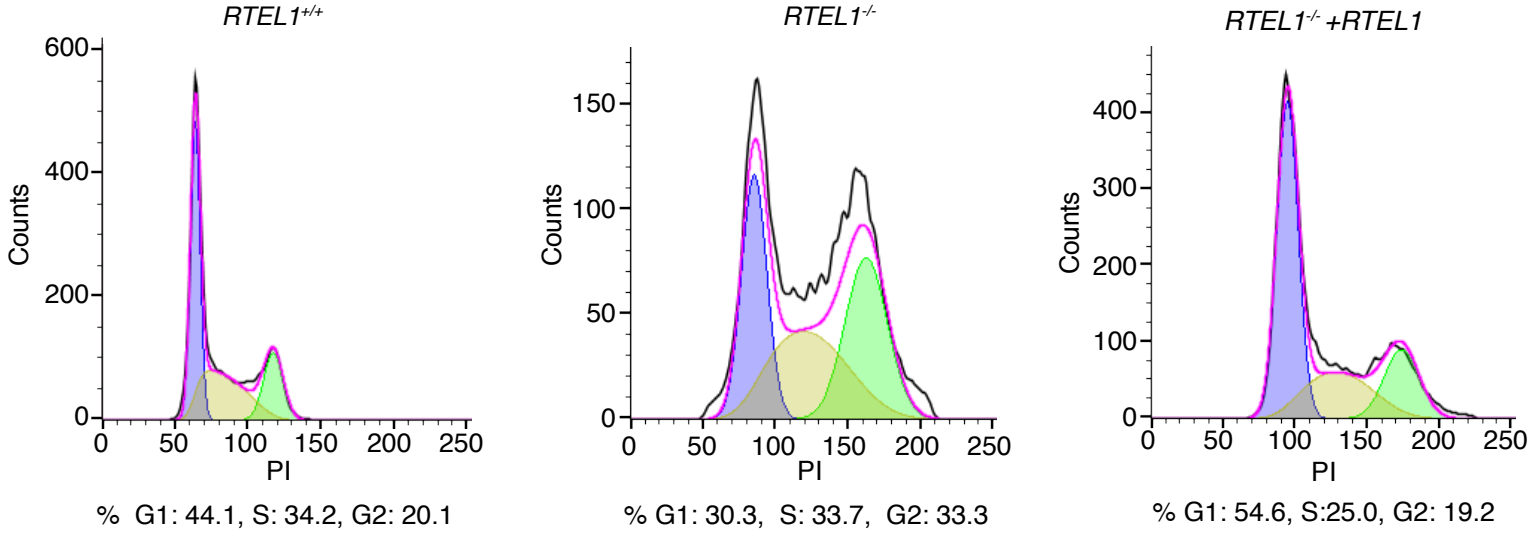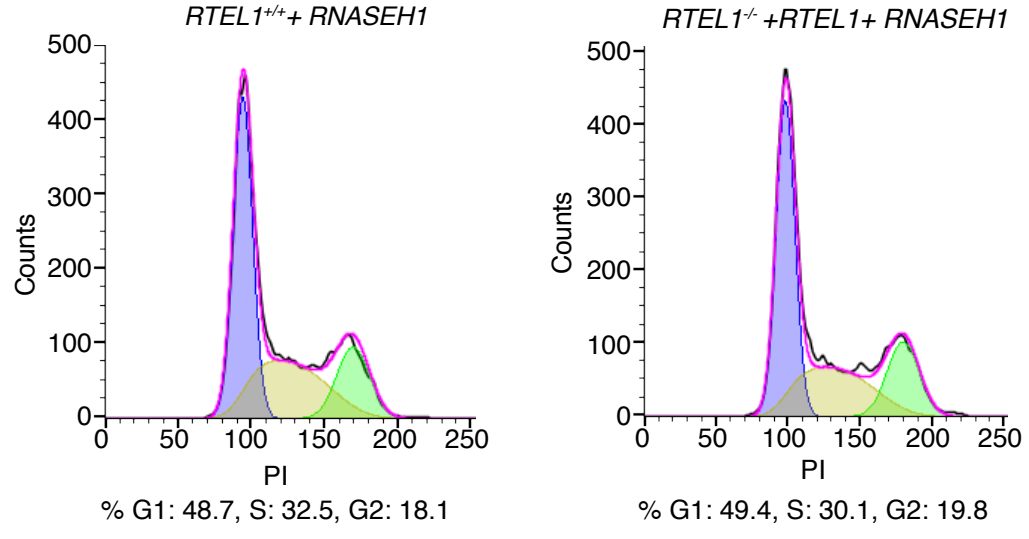

b.

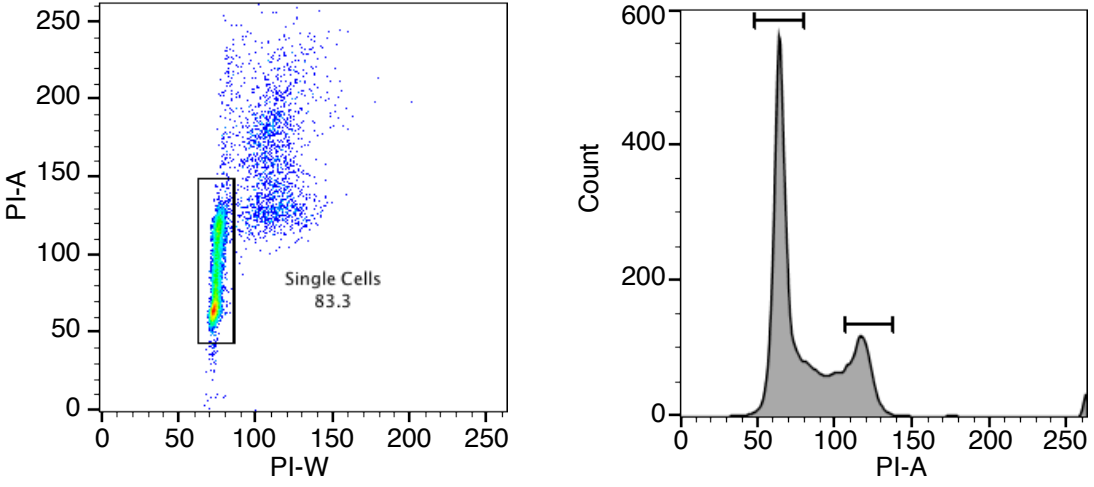

### **Supplementary Figure 8**

Cell cycle analysis was performed by flow cytometry. Cells were fixed, RNase treated, and stained with propidium iodide. (A) Data were analyzed with FlowJo™ software and percentages of cells in different stages of the cell cycle were calculated using the Dean-Jet-Fox model. (B) Representative gating strategy used for flow cytometry analysis is shown. Live cells were gated (SSC/FSC) then singles cells were gated (PI-A/PI-W) and represented as a histogram using PI fluorescence.



# Supplementary Figure 9

a.

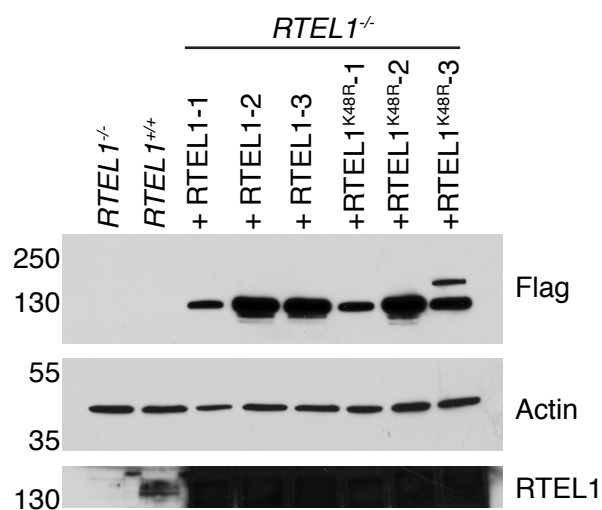

b.

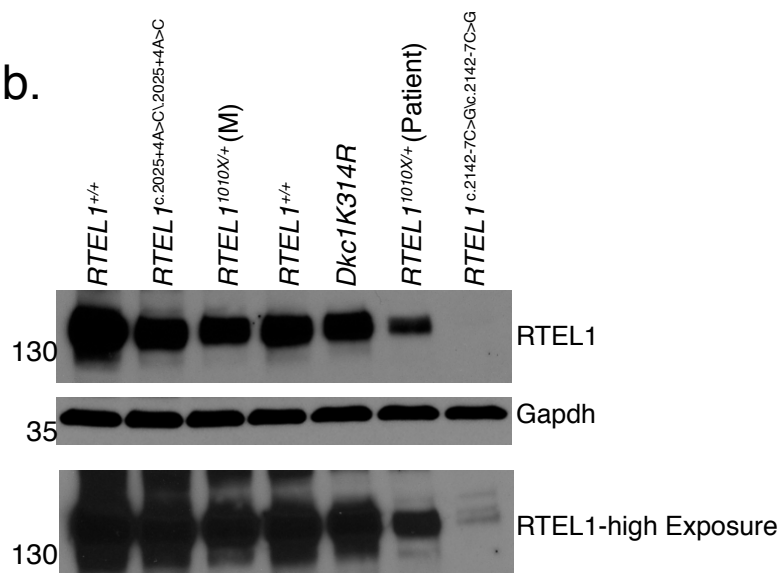

c.

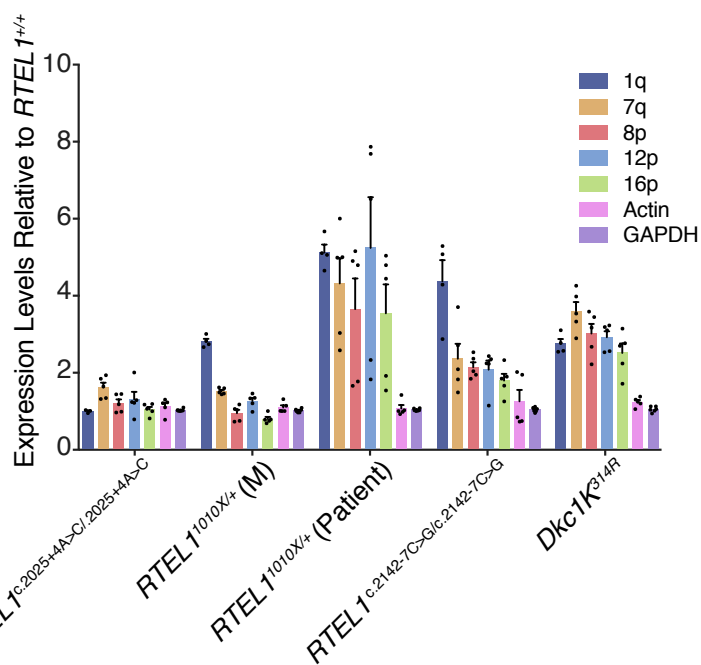

d.

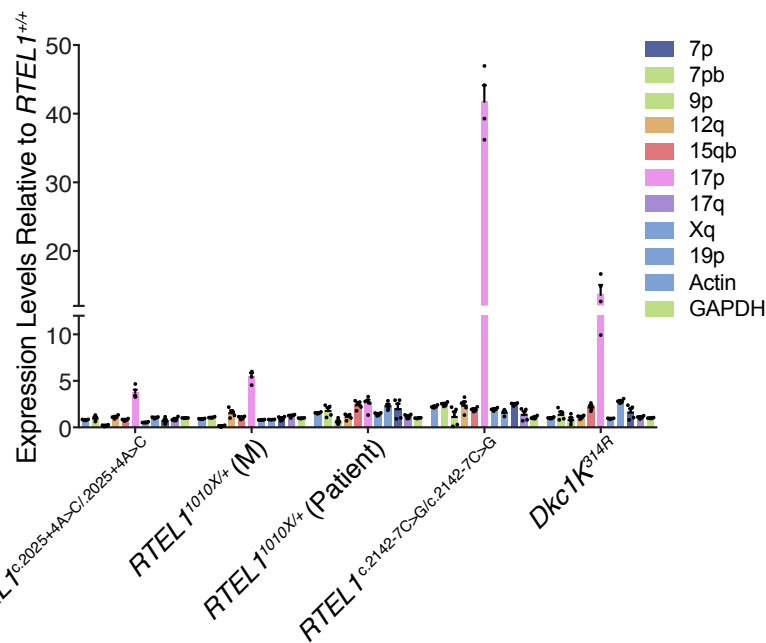

e.

|       | <i>RTTEL1</i> <sup>c.2025+4A&gt;C/2025+4A&gt;C</sup> | <i>RTTEL1</i> <sup>1010X/+ (M)</sup> | <i>Dkc1K</i> <sup>314R</sup> | <i>RTTEL1</i> <sup>1010X/+ (Patient)</sup> | <i>RTTEL1</i> <sup>c.2142-7C&gt;G/c.2142-7C&gt;G</sup> |
|-------|------------------------------------------------------|--------------------------------------|------------------------------|--------------------------------------------|--------------------------------------------------------|
| 10q   | ***                                                  | ns                                   | *                            | ***                                        | *                                                      |
| 12p   | ns                                                   | ns                                   | ****                         | ns                                         | *                                                      |
| 13q   | ns                                                   | **                                   | ****                         | ****                                       | ***                                                    |
| 16p   | ns                                                   | *                                    | **                           | *                                          | **                                                     |
| 19p   | ns                                                   | ns                                   | ns                           | ns                                         | ****                                                   |
| 21q   | ns                                                   | ***                                  | ***                          | ***                                        | ****                                                   |
| 7q    | **                                                   | ****                                 | ****                         | **                                         | ****                                                   |
| 8p    | ns                                                   | ns                                   | **                           | *                                          | ***                                                    |
| 9p    | ****                                                 | ****                                 | ns                           | *                                          | ns                                                     |
| 10qb  | ns                                                   | ****                                 | ****                         | ****                                       | ***                                                    |
| 12q   | ns                                                   | ns                                   | ns                           | ns                                         | **                                                     |
| 13qb  | ns                                                   | ***                                  | ****                         | ****                                       | ***                                                    |
| 15qb  | *                                                    | ns                                   | ***                          | ***                                        | ***                                                    |
| 17p   | ***                                                  | ****                                 | ***                          | *                                          | ****                                                   |
| 17q   | ****                                                 | ****                                 | ns                           | **                                         | ****                                                   |
| 1q    | ns                                                   | ****                                 | ****                         | ****                                       | ****                                                   |
| 2q    | ns                                                   | ****                                 | ****                         | ****                                       | ****                                                   |
| 7p    | ***                                                  | **                                   | ns                           | ****                                       | ****                                                   |
| Xq    | *                                                    | ns                                   | ****                         | ***                                        | **                                                     |
| 10qc  | ***                                                  | **                                   | ***                          | ****                                       | **                                                     |
| 13qc  | ns                                                   | ****                                 | ****                         | ****                                       | **                                                     |
| 7pb   | ns                                                   | ns                                   | ns                           | ns                                         | ****                                                   |
| Actin | ns                                                   | *                                    | ns                           | ns                                         | ns                                                     |
| GAPDH | ns                                                   | ns                                   | ns                           | ns                                         | ns                                                     |

## Supplementary Figure 9

(A) Western blot of RTEL1 protein levels in wild type, RTEL1-KO, and three independent clones of *RTEL1-KO HEK293* cells reconstituted with FLAG-RTEL1 and FLAG-RTEL1<sup>K48R</sup>. Actin was used as loading control, and molecular weight markers, KDa are shown. (B) Endogenous RTEL1 protein levels were measured by western blotting in a panel of patient derived LCL cell lines. Immunoblotting experiments were repeated at least two times producing similar results. TERRA levels are elevated in cells derived from a panel of patient derived LCL lines. (C) Chromosome ends elevated 2.5-5 fold relative to wild type levels are shown. (D) Chromosome ends elevated 2.5 fold or under relative to wild type levels are shown and levels for telomeric end 17p which is CTCF regulated is also shown (Beishline, Vladimirova et al. 2017). Levels were measured by qRT-PCR. Values are sample averages of at least 3 experimental repeats with means and standard deviations shown. (E) Calculated p values for TERRA expression measured by qRT-PCR in three independent experiments shown including p values for **Fig. 3E** (\*p < 0.05, \*\*p < 0.01, \*\*\*p < 0.001, two-sided t-test).

# Supplementary Figure 10

a.

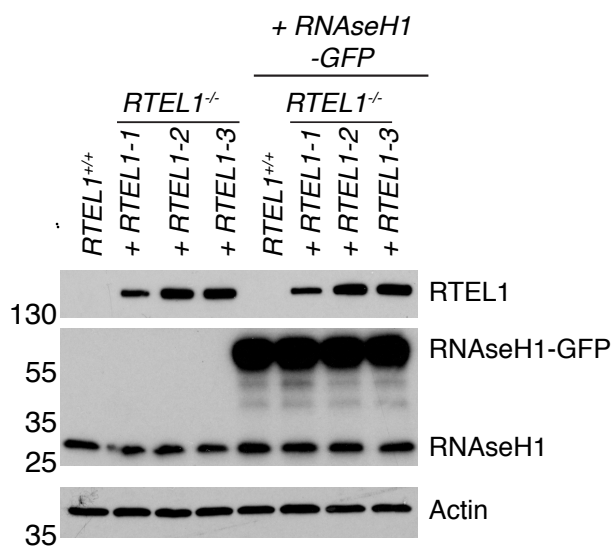

b.

|       | RTTEL1 <sup>+/+</sup> + RNAseH1 | RTTEL1 <sup>-/-</sup> +RTTEL1_1+ RNAseH1 | RTTEL1 <sup>-/-</sup> +RTTEL1_2+ RNAseH1 | RTTEL1 <sup>-/-</sup> +RTTEL1_3+ RNAseH1 |
|-------|---------------------------------|------------------------------------------|------------------------------------------|------------------------------------------|
| 10q   | ***                             | ***                                      | ***                                      | **                                       |
| 10qb  | ***                             | ***                                      | ***                                      | **                                       |
| 13q   | ***                             | ***                                      | ***                                      | **                                       |
| 13qb  | ***                             | ***                                      | ***                                      | ***                                      |
| 2q    | ***                             | ***                                      | ***                                      | **                                       |
| 21q   | ***                             | ***                                      | ***                                      | ***                                      |
| Xq    | n.s                             | n.s                                      | n.s                                      | n.s                                      |
| GAPDH | n.s                             | n.s                                      | n.s                                      | n.s                                      |

c.

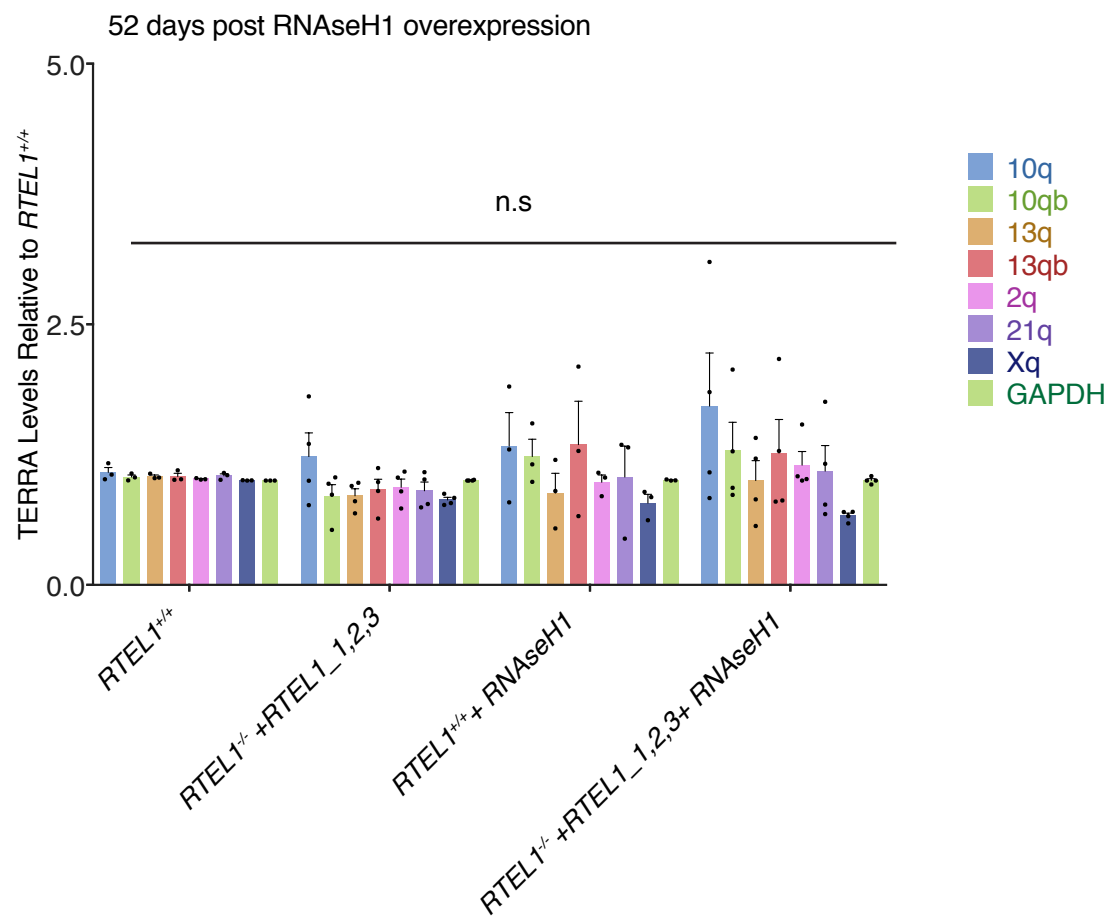

## Supplementary Figure 10

(A) Western blotting of wild type HEK293 cells and RTEL1-KO cells complemented with *FLAG-RTEL1* and transfected with *RNase H1-GFP*. Three independent clones of *RTEL1-KO HEK293* cells reconstituted with FLAG-RTEL1 and with or without *RNase H1-GFP* are shown. Molecular weight markers, KDa are shown. (B) Calculated p values for TERRA expression measured by qRT-PCR in three independent experiments shown in Fig. 5B (\*p < 0.05, \*\*p < 0.01, \*\*\*p < 0.001, two-sided t-test). (C) TERRA levels 52 days post *RNase H1* overexpression. TERRA levels of indicated chromosome ends were tested in cells transfected with *RNase H1-GFP* 52 days post G418 selection. TERRA levels were measured by qRT-PCR. Three independent cell lines complemented with RTEL1 were averaged for analysis. Values are sample averages of at least 3 experimental repeats (\*p < 0.05, \*\*p < 0.01, \*\*\*p < 0.001, two-sided t-test) with mean and standard deviation shown.

# Supplementary Table 1

| Primer Set | Primer Name | Primer Sequence               | Unique | Reference                                                                         |
|------------|-------------|-------------------------------|--------|-----------------------------------------------------------------------------------|
| 1          | 1q_F        | GCATTCCCTAATGCACACATGAC       | yes    | M. Feretzaki, J. Lingner / Methods 114 (2017) 39–45                               |
|            | 1q_R        | ACCCTAACCCGAACCCTA            |        |                                                                                   |
| 2          | 2q_F        | AAAGCGGGAAACGAAAAGC           | no     | EMBO J (2012)31:4165-4178 and M. Feretzaki, J. Lingner / Methods 114 (2017) 39–45 |
|            | 2q_R        | GCCTTGCCTTGGGAGAATCT          |        |                                                                                   |
| 3          | H2p_F       | CGCATCGACG GTGAATAAAA         | yes    | Sagie, S. et al. T., Nat. Commun. 8:14015 (2017)                                  |
|            | H2p_R       | GCCTAACTCGTG TCTGACTTTGAG     |        |                                                                                   |
| 4          | H7q_F       | TTCAGACGGG CTTTTGGTTT         | yes    | Sagie, S. et al. T., Nat. Commun. 8:14015 (2017)                                  |
|            | H7q_R       | ATGGTGAATACA A TCCTTTCTGTTT G |        |                                                                                   |
| 5          | H_7p_F      | GGAGGCTGAGGCAGGAGAA           | no     | EMBO J (2012)31:4165-4178 and M. Feretzaki, J. Lingner / Methods 114 (2017) 39–45 |
|            | H_7p_R      | CAATCTCGGCTCACACAATC          |        |                                                                                   |
| 6          | H_7p_Fb     | GAGAGAGGGTTTCACTCTGTTG        | yes    | M. Feretzaki, J. Lingner / Methods 114 (2017) 39–45                               |
|            | H_7p_Rb     | GGTGGTTCACGCCTGTAAT           |        |                                                                                   |
| 7          | H8p_F       | CCGGTTGCAG CCGTTAATA          | yes    | Sagie, S. et al. T., Nat. Commun. 8:14015 (2017)                                  |
|            | H8p_R       | GGCTTTTGGTTTC CCGTTTT         |        |                                                                                   |
| 8          | H9p_F       | CGGAAAACGG GAAAGCAAA          | no     | Sagie, S. et al. T., Nat. Commun. 8:14015 (2017)                                  |
|            | H9p_R       | CGTTCCGACGCT GCAAGT           |        |                                                                                   |
| 9          | H10q_F      | AACCTGAACC CTAACCCTCC         | no     | Sagie, S. et al. T., Nat. Commun. 8:14015 (2017)                                  |
|            | H10q_R      | A TTGCAGGGTTC AAGTGCAG        |        |                                                                                   |
| 10         | H10q_Fb     | AAAGCGGGAAACGAAAAGC           | no     | EMBO J (2012)31:4165-4178 and M. Feretzaki, J. Lingner / Methods 114 (2017) 39–45 |
|            | H10q_Rb     | GCCTTGCCTTGGGAGAATCT          |        |                                                                                   |
| 11         | H10q_Fc     | ATGCACACATGACACCCTAAA         | yes    | M. Feretzaki, J. Lingner / Methods 114 (2017) 39–45                               |
|            | H10q_Rc     | TACCCGAACCTGAACCCTAA          |        |                                                                                   |
| 12         | 12q_F       | ATTTCCCGTTTTCCACACTGA         | no     | EMBO J (2012)31:4165-4178 and M. Feretzaki, J. Lingner / Methods 114 (2017) 39–45 |
|            | 12q_R       | CTGTTTGCAGCGCTGAATATTC        |        |                                                                                   |
| 13         | H12p_F      | AGAACTCTGC TCCGCCTTC          | yes    | Sagie, S. et al. T., Nat. Commun. 8:14015 (2017)                                  |
|            | H12p_R      | GTTGCGTTCTCTT CAGCACA         |        |                                                                                   |
| 14         | H13q_F      | CCCGCTTTCCA CACTAAACC         | yes    | Sagie, S. et al. T., Nat. Commun. 8:14015 (2017)                                  |
|            | H13q_R      | CGCA TCGACAGT GAATAAATCTT T   |        |                                                                                   |
| 15         | H13q_Fb     | CCTGCGACCCGAGATTCT            | no     | EMBO J (2012)31:4165-4178 and M. Feretzaki, J. Lingner / Methods 114 (2017) 39–45 |
|            | H13q_Rb     | GCACTTGAACCCTGCAATACAG        |        |                                                                                   |
| 16         | H13q_Fc     | CTGCCTGCCTTTGGGATAA           | yes    | M. Feretzaki, J. Lingner / Methods 114 (2017) 39–45                               |
|            | H13q_Rc     | AAACCGTTCTAACTGGTCTCTG        |        |                                                                                   |
| 17         | H_15q_Fb    | TGCAACCGGGAAAGATTTTATT        | no     | EMBO J (2012)31:4165-4178 and M. Feretzaki, J. Lingner / Methods 114 (2017) 39–45 |
|            | H_15q_Rb    | GCGTGGCTTTGGGACAAC            |        |                                                                                   |
| 18         | H16p_F      | AACGGTTCAG TGTGGAAAA T GG     | yes    | Sagie, S. et al. T., Nat. Commun. 8:14015 (2017)                                  |
|            | H16p_R      | CAACTGGACCCT GCAA TGC         |        |                                                                                   |
| 19         | 17q_F       | GTCCATGCATTCTCCATTGATAAG      | no     | EMBO J (2012)31:4165-4178 and M. Feretzaki, J. Lingner / Methods 114 (2017) 39–45 |
|            | 17q_R       | AGCTACCTCTCTCAACACCAAGAAG     |        |                                                                                   |
| 20         | H_17p_F     | GGGACAGAAGTGGATAAGCTGATC      | no     | EMBO J (2012)31:4165-4178 and M. Feretzaki, J. Lingner / Methods 114 (2017) 39–45 |
|            | H_17p_R     | GATCCCACTGTTTTTATTACTGTTCTT   |        |                                                                                   |
| 21         | H19p_F      | GCA TCGACGG TGAATTAAT CTT     | yes    | Sagie, S. et al. T., Nat. Commun. 8:14015 (2017)                                  |
|            | H19p_R      | GGCTTTTGGTTTC CCGTTTT         |        |                                                                                   |
| 22         | H21q_F      | GAATAAAATC TTTCCCGTTG CT      | no     | Sagie, S. et al. T., Nat. Commun. 8:14015 (2017)                                  |
|            | H21q_R      | CCGCTTTCCACAC TAAACCATT       |        |                                                                                   |
| 23         | H22q_F      | CGAAACAGAA CCCGAAGCAG         | no     | Sagie, S. et al. T., Nat. Commun. 8:14015 (2017)                                  |
|            | H22q_R      | TGCACACA TGAC ACCCAAAA        |        |                                                                                   |
| 24         | H_Xyq_F     | CCCCTTGCCTTGGGAGAA            | no     | EMBO J (2012)31:4165-4178 and M. Feretzaki, J. Lingner / Methods 114 (2017) 39–45 |
|            | H_Xyq_R     | GAAAGCAAAGCCCCCTCTGA          |        |                                                                                   |
| 25         | HGAPDH_F    | AGCCACATCGCTCAGACAC           | na     | M. Feretzaki, J. Lingner / Methods 114 (2017) 39–45                               |
|            | HGAPDH_R    | GCCCAATACGACCAATCC            |        |                                                                                   |
| 26         | Hβ-actin F  | TCCCTGGAGAAGAGCTACGA          | na     | Sagie, S. et al. T., Nat. Commun. 8:14015 (2017)                                  |
|            | Hβ-actin R  | AGCACTGTGTTGGCGTACAG          |        |                                                                                   |

### **Supplementary Table 1. qRT-PCR Primers used in this study**

Primer sequences used in this study. References for primer validation and if the primer pairs are unique is indicated.
